# Supplementary material for: Sex or Fission? Genetics Highlight Differences in Reproductive Strategies of Two Sympatric Fissiparous Sea Cucumber Species in Reunion Island (Southwestern Indian Ocean)
Source: MDPI journal article supplement (doi:10.3390/d15050670), 2023-05-15
Supplement: s1 [file s1]

# **Sex or Fission? Genetics Highlights Differences in Reproductive Strategies of Two Sympatric Fissiparous Sea Cucumber Species in Reunion Island (Southwestern Indian Ocean)**

Joséphine Pierrat <sup>1,\*</sup> • Nicolas Oury <sup>1,2</sup> • Patrick Frouin <sup>1,3</sup> • Hélène Magalon <sup>1,2,3</sup>

<sup>1</sup> UMR ENTROPIE (Université de La Réunion, Université de Nouvelle-Calédonie, IRD, CNRS, IFREMER), Faculté des Sciences et Technologies, Université de La Réunion, 15 Bd René Cassin, CS 92003, 97744 St Denis, Cedex 09, La Réunion, France

<sup>2</sup> Laboratoire Cogitamus, Paris, France

<sup>3</sup> Laboratoire d'Excellence Corail, Perpignan, France

\*Corresponding author: josephine.pierrat@univ-reunion.fr

JP: <https://orcid.org/0000-0002-4627-9823>

NO: <https://orcid.org/0000-0002-5386-4633>

PF: <https://orcid.org/0000-0001-6222-8818>

HM: <https://orcid.org/0000-0002-7061-955X>

**Table S1:** Summary of the sampling design

| Species                        | Reef                  | Site                    | Density | Code | Latitude (S) | Longitude (E) | N S1 <sub>cold</sub> | N S2 <sub>warm</sub> | N S3 <sub>cold</sub> | N Total |
|--------------------------------|-----------------------|-------------------------|---------|------|--------------|---------------|----------------------|----------------------|----------------------|---------|
| <i>Holothuria leucospilota</i> | L'Hermitage/La Saline | Maître-Nageur-Sauveteur | High    | MNS  | 21°04'10.54" | 55°13'11.92"  | 24                   | 24                   | 24                   | 72      |
|                                |                       | Cap-Méchant             | Low     | CAP  | 21°04'54.05" | 55°13'23.29"  | 12                   | 12                   | 12                   | 36      |
|                                |                       | Planch'Alizé            | High    | PLA  | 21°05'41.70" | 55°14'01.65"  | 24                   | 24                   | 24                   | 72      |
|                                |                       | Petit Trou d'Eau        | Low     | PTE  | 21°05'59.95" | 55°14'25.73"  | 12                   | 12                   | 12                   | 36      |
|                                |                       | Trou d'Eau              | High    | TE   | 21°06'11.52" | 55°14'44.61"  | 24                   | 24                   | 24                   | 72      |
| <i>Stichopus chloronotus</i>   | L'Hermitage/La Saline | Passe de l'Hermitage    | High    | PAS  | 21°05'05.58" | 55°13'32.39"  | 24                   | 24                   | 24                   | 72      |
|                                |                       | Trou d'Eau              | High    | TE   | 21°06'11.52" | 55°14'44.61"  | 24                   | 24                   | 24                   | 72      |
|                                | Étang-Salé            | Étang-Salé              | High    | ES   | 21°16'05.89" | 55°19'57.29"  | 24                   | 24                   | 24                   | 72      |

*N* indicates the number of individuals sampled.

S1<sub>cold</sub>: austral winter 2019; S2<sub>warm</sub>: austral summer 2020; S3<sub>cold</sub>: austral winter 2020

**Figure S1:** Distribution of pairwise differences (number of alleles shared) among multi-locus genotypes (MLG) for *Holothuria leucospilota*.

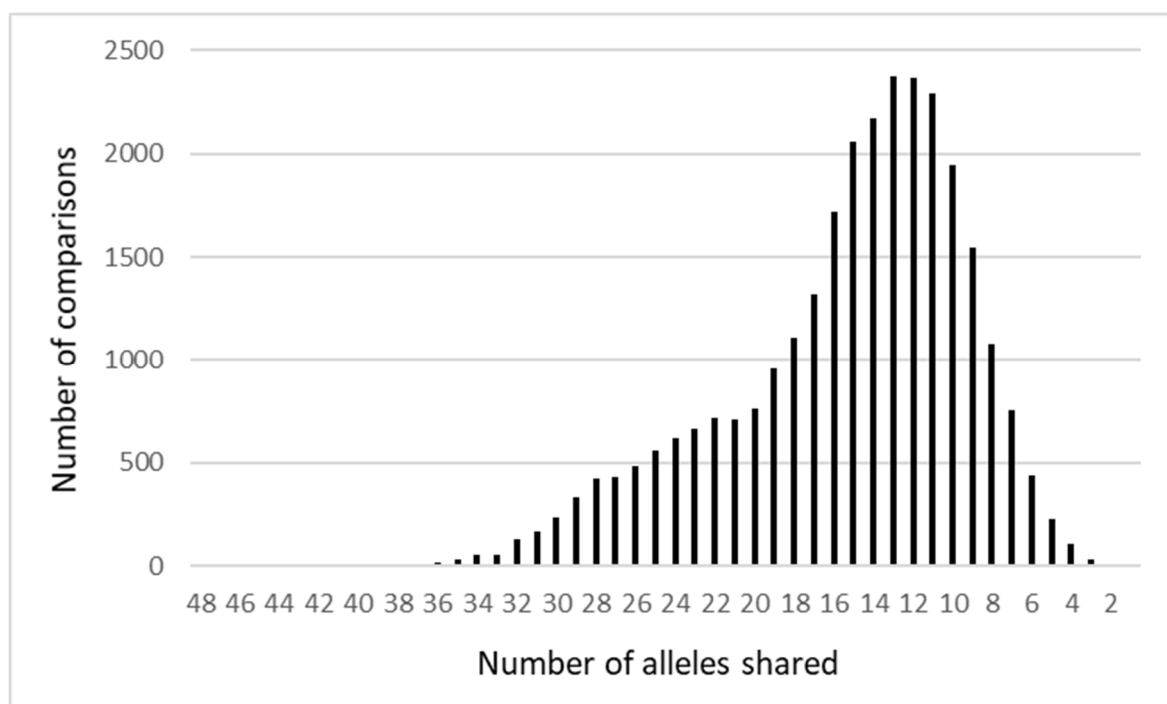

**Figure S2:** Results of the assignment tests for *Holothuria leucospilota*. (a) mean likelihood over the five iterations of the same  $K$ , (b) Evanno's  $\Delta K$  distribution, (c) BIC distribution and (d) plots from  $K = 2$  to  $K = 5$  for Structure (above) and DAPC (below).

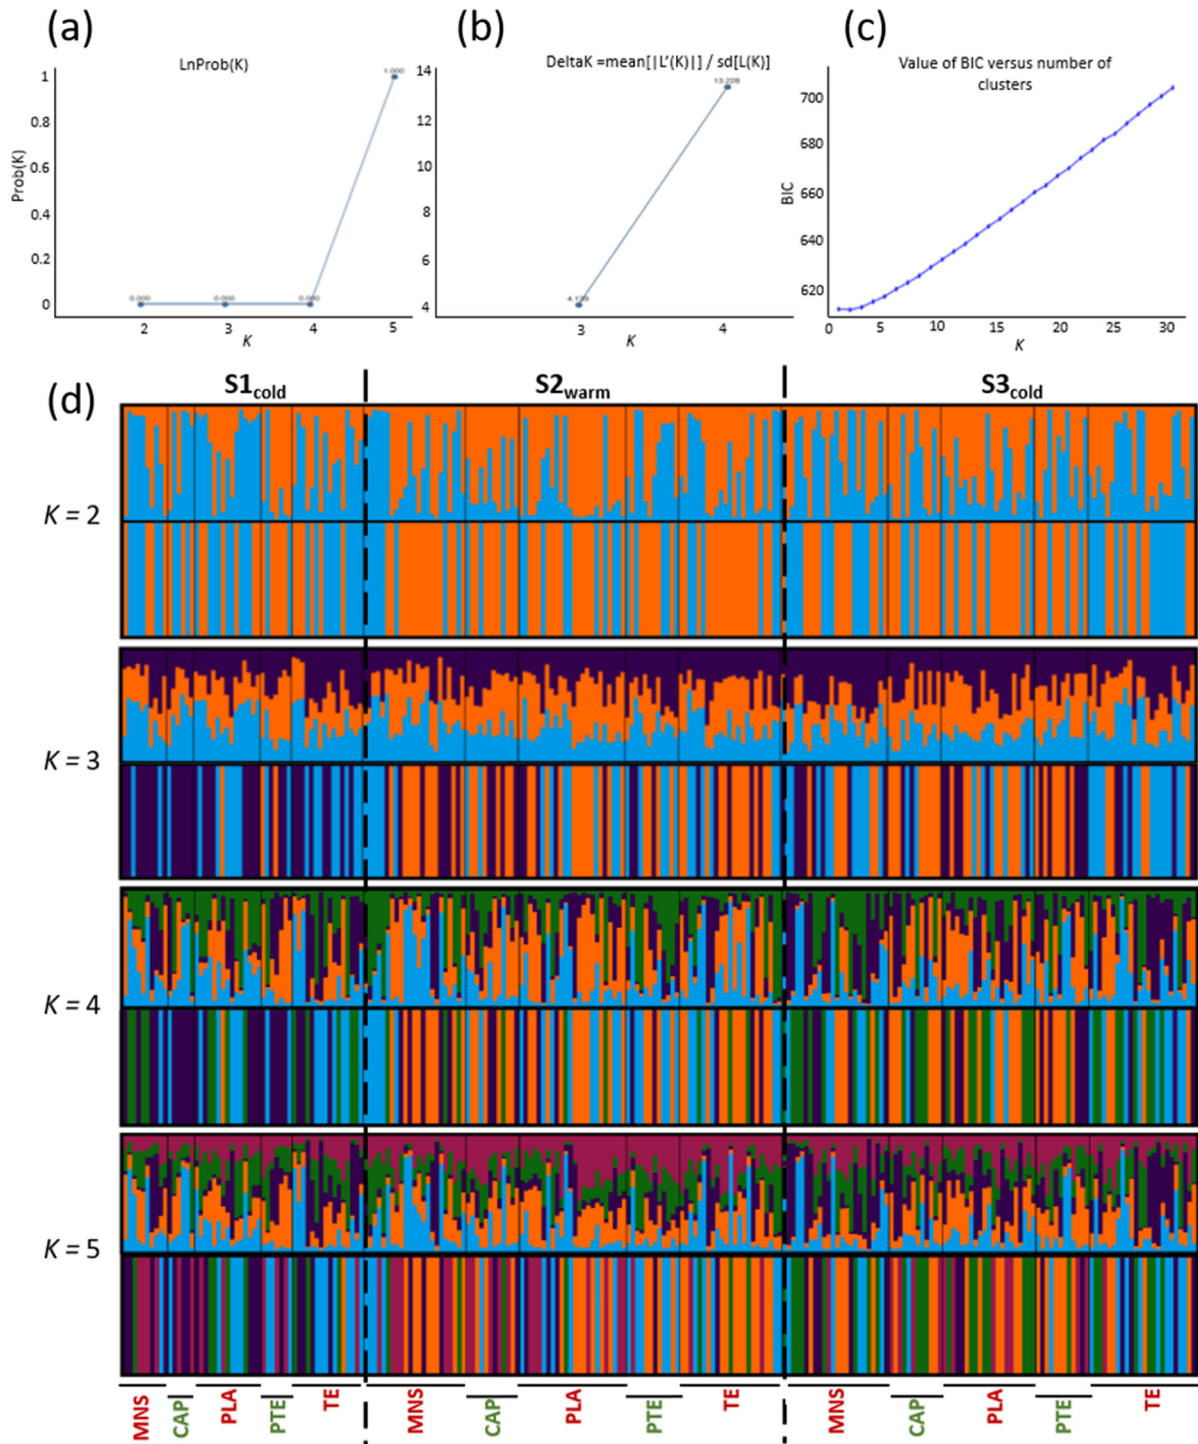

High density sites in red: MNS: Maître-Nageur-Sauveteur, PLA: Planch'Alizé, TE: Trou d'Eau  
 Low density sites in green: CAP: Cap-Méchant, PTE: Petit Trou d'Eau  
 S1<sub>cold</sub>: austral cold season 2019, S2<sub>warm</sub>: austral warm season 2020, S3<sub>cold</sub>: austral cold season 2020

**Figure S3:** Results of the assignment tests for *Stichopus chloronotus*. (a) mean likelihood over the five iterations of the same  $K$ , (b) Evanno's  $\Delta K$  distribution, (c) BIC distribution and (d) plots from  $K = 2$  to  $K = 5$  for Structure (above) and DAPC (below).

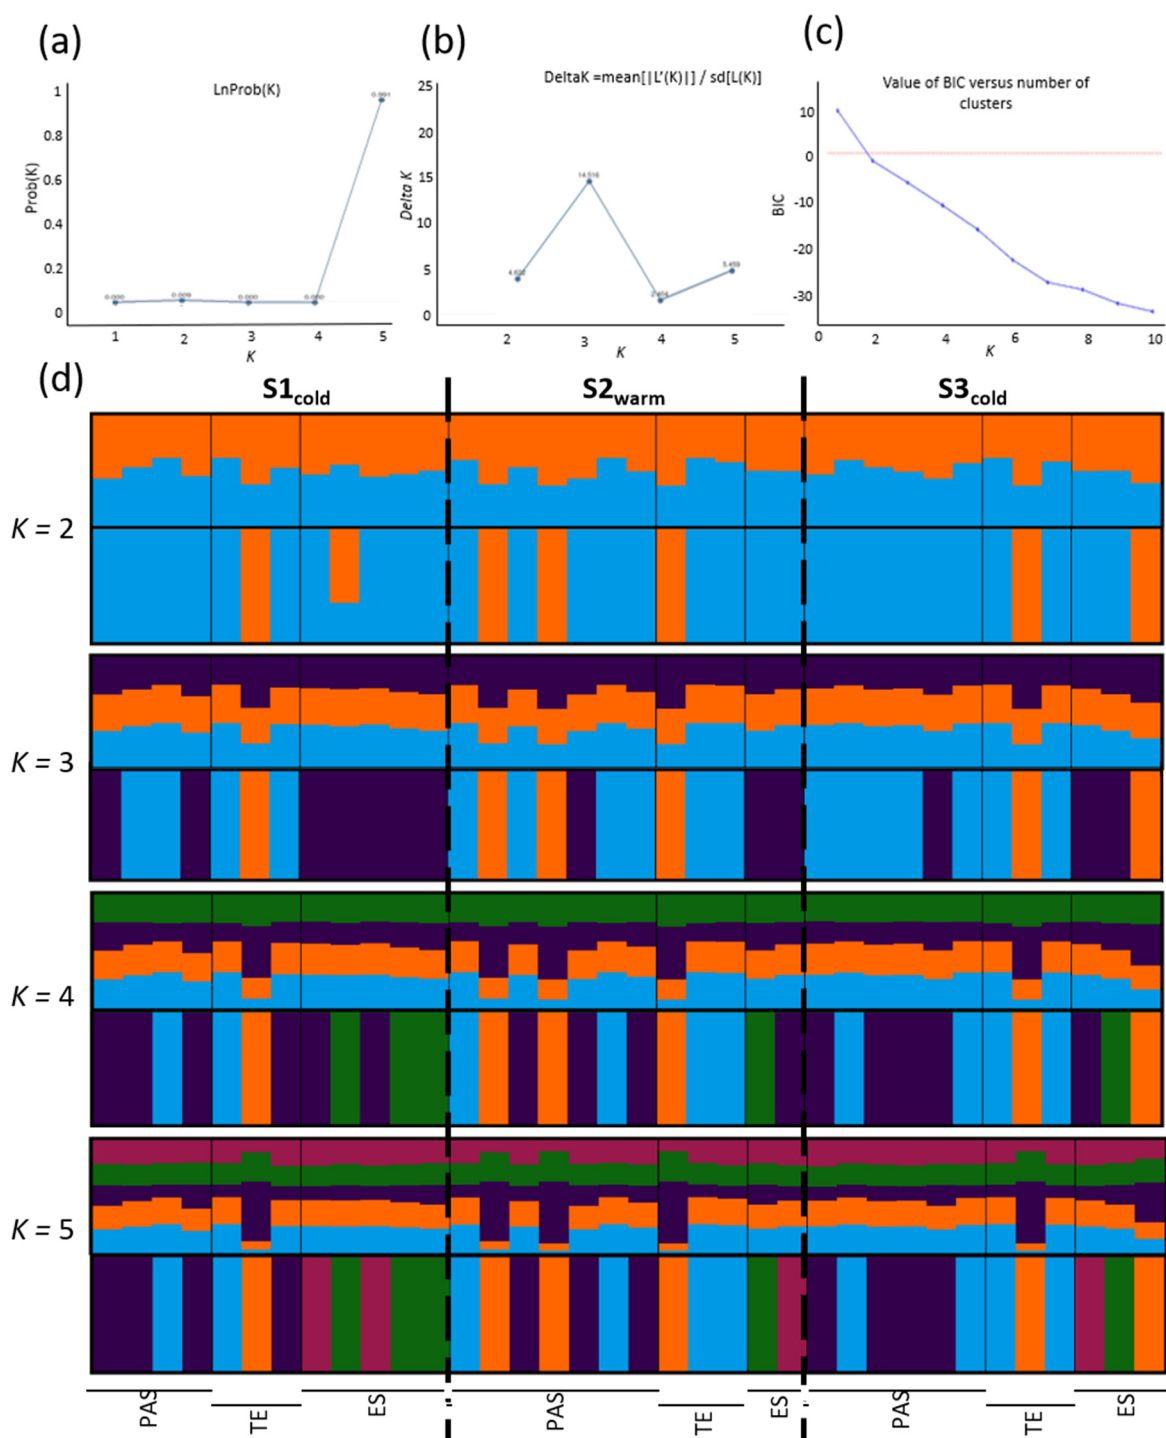

PAS: Passe de l'Ermitage, TE: Trou d'Eau, ES: Étang-Salé

S1<sub>cold</sub>: austral cold season 2019, S2<sub>warm</sub>: austral warm season 2020, S3<sub>cold</sub>: austral cold season 2020

**Figure S4:** Results of the assignment tests for *Stichopus chloronotus* keeping only one representative per MLG, for each site, all seasons pooled. (a) mean likelihood over the five iterations of the same  $K$ , (b) Evanno's  $\Delta K$  distribution, (c) BIC distribution and (d) plots from  $K = 2$  to  $K = 5$  for Structure (above) and DAPC (below).

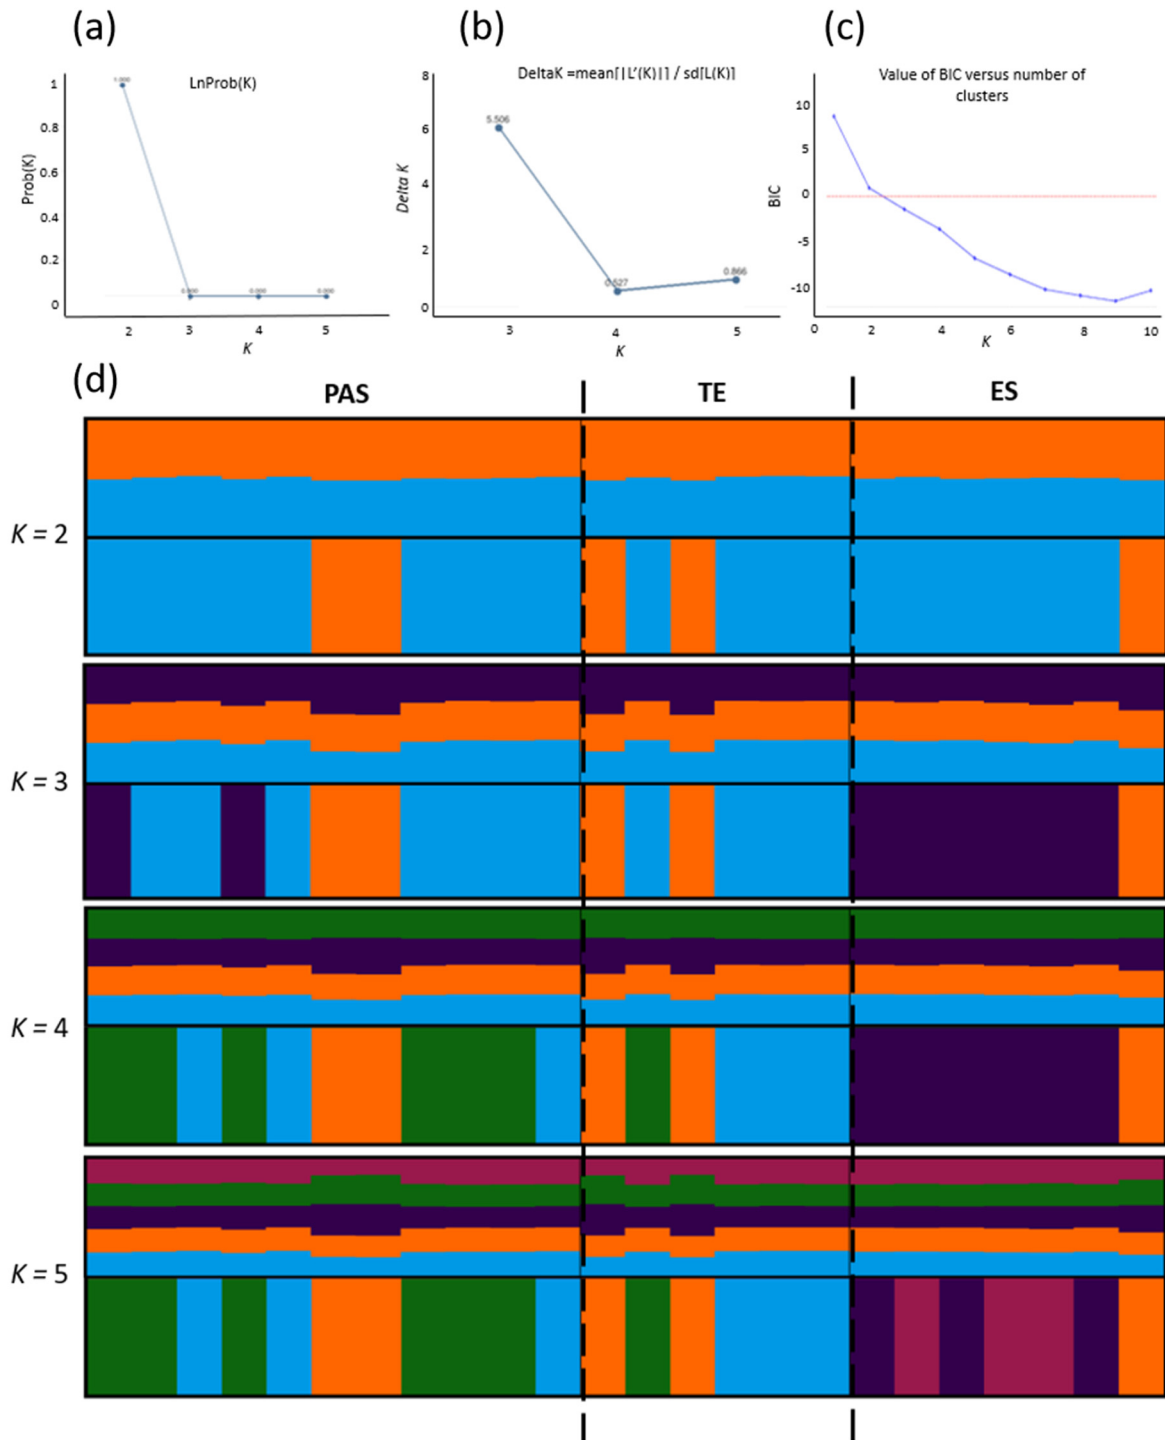

PAS: Passe de l'Hermitage, TE: Trou d'Eau, ES: Étang-Salé
